# Supplementary material for: Computational Models of HIV-1 Resistance to Gene Therapy Elucidate Therapy Design Principles
Source: PLOS journal article supplement (doi:10.1371/journal.pcbi.1000883), 2010-08-12

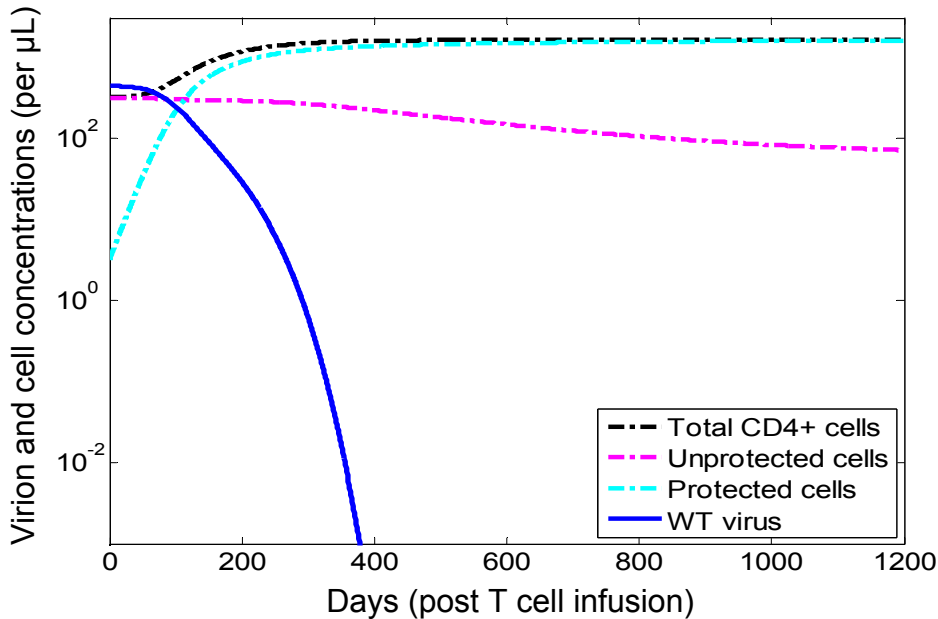

Supplement: S2 (10.1371/journal.pcbi.1000883.s002) [file journal.pcbi.1000883.s002]
